# Supplementary material
Source: MDPI journal article supplement (https://www.mdpi.com/2075-5309/13/4/1007)
Supplement: s1 [file s1]

Archive with 2 entries (2 files):
- Analysis of Electricity & Water Consumption in Existing Mosque Buildings in the UAE - File S2.pdf
- Analysis of Electricity & Water Consumption in Existing Mosque Buildings in the UAE -File S1.pdf
