# Supplementary material
Source: MDPI journal article supplement (https://www.mdpi.com/2075-5309/13/4/1007)
Supplement: s1 [file s1]

**Supplementary Materials S1**  
**List of abbreviations mentioned in the paper.**

Part 1: General Abbreviations

| <b>Abbreviation</b>   | <b>Description</b>                                              | <b>Measurement Unit</b> |
|-----------------------|-----------------------------------------------------------------|-------------------------|
| <b>UAE</b>            | United Arab Emirates                                            | N/A                     |
| <b>DOE</b>            | Department of Energy Abu Dhabi                                  | N/A                     |
| <b>FEWA</b>           | Federal Electricity & Water Authority                           | N/A                     |
| <b>DEWA</b>           | Dubai Electricity & Water Authority                             | N/A                     |
| <b>SEWGA</b>          | Sharjah Electricity, Water and Gas Authority                    | N/A                     |
| <b>GWh</b>            | Gigawatt hours                                                  | N/A                     |
| <b>AC</b>             | Air Conditioning                                                | N/A                     |
| <b>CO<sub>2</sub></b> | Carbon Dioxide                                                  | Kilogram (kg)           |
| <b>EPI</b>            | Energy Performance Index                                        | kWh/m <sup>2</sup>      |
| <b>ESMA</b>           | Emirates Authority for Standardization and Metrology            | N/A                     |
| <b>LR</b>             | Replacement of existing inefficient lights/Retrofitting.        | N/A                     |
| <b>LT</b>             | Lighting Automation.                                            | N/A                     |
| <b>MSQTHR</b>         | Mosque Thermostat.                                              | N/A                     |
| <b>EEACU</b>          | Energy Efficient Air Conditioning Units,                        | N/A                     |
| <b>HVAC</b>           | Heating, Ventilation, and Air Conditioning.                     | N/A                     |
| <b>HVACA</b>          | HVAC Options A- (installation of Energy saver for Split Units). | N/A                     |
| <b>IBSC</b>           | IOT Based Smart Control.                                        | N/A                     |
| <b>EIFWF</b>          | Efficiency Improvement for water fixtures                       | N/A                     |
| <b>A</b>              | Aerators                                                        | N/A                     |
| <b>SCFWA</b>          | Self-Closing Faucets with Aerators                              | N/A                     |
| <b>WR</b>             | Water Recycling                                                 | N/A                     |
| <b>ECMS%</b>          | Energy Savings from Energy Conservation Measure                 | %                       |
| <b>%TES</b>           | Percentage of Total Energy Saving                               | %                       |
| <b>PBP</b>            | Simple Payback Period                                           | No. of years            |
| <b>AED</b>            | United Arab Emirates Dirhams                                    | N/A                     |
| <b>Std Err</b>        | Standard Error                                                  | N/A                     |
| <b>95% CL Mean</b>    | 95% Confidence Limits of the Mean                               | N/A                     |
| <b>Std Dev</b>        | Standard Deviation                                              | N/A                     |
| <b>95% CL Std Dev</b> | 95% Confidence Limits of the Standard Deviation                 | N/A                     |

Part 2: Abbreviations used in the parameters for data collection.

| Parameter Code          | Parameter Description                                                              | Parameter Unit                 |
|-------------------------|------------------------------------------------------------------------------------|--------------------------------|
| <b>Y</b>                | Year of Construction                                                               | N/A                            |
| <b>A</b>                | Building Usable Area in m <sup>2</sup>                                             | Square meter (m <sup>2</sup> ) |
| <b>PEC</b>              | Pre-Audit Electricity Consumption                                                  | Megawatt hour (MWh)            |
| <b>PCO<sub>2</sub></b>  | Pre-Audit CO <sub>2</sub> Emission                                                 | kg.CO <sub>2</sub>             |
| <b>PEPI</b>             | Pre-Audit Energy Performance Index (EPI)                                           | kWh/m <sup>2</sup>             |
| <b>ES</b>               | Types of existing systems in mosques prior to audits                               | N/A                            |
| <b>ECMs</b>             | Types of Energy Conservation Measures implemented in the mosque post-energy audit. | N/A                            |
| <b>ECMS%</b>            | Percentage of ECMs savings (ECMS%).                                                | %                              |
| <b>ECMS (kWh)</b>       | ECM's Savings (Electricity)                                                        | kWh                            |
| <b>TECMS</b>            | Total ECM's Savings                                                                | kWh                            |
| <b>IC</b>               | ECM Implementation Cost (Electricity)                                              | Dhs (AED)                      |
| <b>TIC</b>              | Total ECM Implementation Cost                                                      | Dhs (AED)                      |
| <b>PBP</b>              | Payback Period for both electricity and water                                      | No. of Years                   |
| <b>PAEC</b>             | Post Audit Electricity Consumption                                                 | kWh                            |
| <b>PAEPI</b>            | Post Audit Energy Performance Index                                                | kWh/m <sup>2</sup>             |
| <b>PACO<sub>2</sub></b> | Post Audit CO <sub>2</sub> Emission                                                | kg.CO <sub>2</sub>             |
| <b>TES%</b>             | Percentage of Total Electricity Savings                                            | %                              |
| <b>PCWC</b>             | Pre-Audit Chilled Water Consumption                                                | m <sup>3</sup>                 |
| <b>PWUI</b>             | Pre-Audit Water Unit Intensity (WUI)                                               | m <sup>3</sup> /m <sup>2</sup> |
| <b>WCMs</b>             | Types of Water Conservation Measures implemented in the mosque post-energy audit.  | N/A                            |
| <b>PACWC</b>            | Post Audit Chilled Water Consumption                                               | m <sup>3</sup>                 |
| <b>PAWUI</b>            | Post-Audit Water Unit Intensity (WUI)                                              | m <sup>3</sup> /m <sup>2</sup> |
| <b>TWCMS</b>            | Total WCM's Savings                                                                | Dhs (AED)                      |
| <b>WCMW</b>             | Water Conservation Measure Savings                                                 | kWh                            |
| <b>WCMIC</b>            | Water Conservation Measure Implementation Cost                                     | Dhs (AED)                      |
